# Supplementary material for: Highlights on Genomics Applications for Lysosomal Storage Diseases
Source: MDPI journal article supplement (doi:10.3390/cells9081902), 2020-08-14
Supplement: s1 [file s1]

**LSDs newborn screening programs worldwide**

|                               | <b>Pompe</b> | <b>MPSI</b> | <b>Krabbe</b> | <b>Fabry</b> | <b>Gaucher</b> | <b>Niemann-Pick<br/>(A/B)</b> | <b>Other<br/>MPSs</b> |
|-------------------------------|--------------|-------------|---------------|--------------|----------------|-------------------------------|-----------------------|
| <b>AMERICA</b>                |              |             |               |              |                |                               |                       |
| California                    | [1]          | *           |               |              |                |                               |                       |
| Delaware                      | *            | *           |               |              |                |                               |                       |
| District of<br>Columbia       | *            | *           |               |              |                |                               |                       |
| Illinois                      | [2, 3]       | [2]         | *             | [2, 3]       | [2, 3]         | [2]                           |                       |
| Kentucky                      | [4]          | [4]         | [4]           |              |                |                               |                       |
| Maryland                      | *            | *           |               | *            |                |                               |                       |
| Massachusetts                 | *            | *           |               |              |                |                               |                       |
| Mexico                        | [5]          | [5]         | [5]           | [5]          | [5]            | [5]                           |                       |
| Michigan                      | *            | *           |               |              |                |                               |                       |
| Minnesota                     | *            | *           |               |              |                |                               |                       |
| Mississippi                   | *            | *           |               |              |                |                               |                       |
| Missouri                      | [6]          | [6]         | *             | [6]          | [6]            |                               |                       |
| Nebraska                      | *            | *           |               |              |                |                               |                       |
| New York                      | [7]          | [7]         | [8]           | [7]          | [7]            | [7]                           |                       |
| North Carolina                |              | [9]         |               |              |                |                               |                       |
| Ohio                          | *            | *           | *             |              |                |                               |                       |
| Oregon                        | *            | *           |               |              |                |                               |                       |
| Pennsylvania                  | *            | *           |               |              |                |                               |                       |
| Rhode island                  | *            | *           |               |              |                |                               |                       |
| Tennessee                     | *            | *           | *             | *            | *              |                               |                       |
| Vermont                       | *            | *           |               |              |                |                               |                       |
| Virginia                      | *            | *           |               |              |                |                               |                       |
| Washington                    | [10,<br>11]  | [10,<br>11] | [10]          | [10,<br>11]  | [10]           | [10]                          | [12]                  |
| Rio Grande do Sul<br>(Brazil) | [13]         | [13]        |               | [13]         | [13]           |                               | [14]                  |
| <b>EUROPE</b>                 |              |             |               |              |                |                               |                       |
| Austria                       | [15]         |             |               | [15]         | [15]           | [15]                          |                       |
| Belgium                       | [16]         | [16]        |               | [16]         |                |                               |                       |
| Hungary                       | [17]         |             |               | [17]         | [17]           | [17]                          |                       |
| Italy                         | [18]         | [18,<br>19] |               | [18,<br>20]  | [18, 21]       |                               |                       |
| Spain                         |              |             |               | [22]         |                |                               |                       |
| <b>ASIA</b>                   |              |             |               |              |                |                               |                       |
| Japan                         | [23]         |             |               |              |                |                               |                       |
| South Korea                   | [24,<br>25]  | [24]        | [24]          | [24,<br>25]  | [24, 25]       | [24]                          |                       |
| Shanghai (China)              |              |             |               |              | [26]           |                               |                       |
| Taiwan                        | [27-29]      | [28]        |               | [28]         | [28]           |                               | [30]                  |
| <b>OCEANIA</b>                |              |             |               |              |                |                               |                       |
| South Australia               | [31]         | [31]        |               | [31]         | [31]           | [31]                          | [31]                  |

\* Where otherwise specified, information were extracted from <http://babysfirsttest.org/> - update May 2020. Please, refer to this database for updated news.

1. Tang, H.; Feuchtbaum, L.; Sciortino, S.; Matteson, J.; Mathur, D.; Bishop, T.; Olney, R. S., The First Year Experience of Newborn Screening for Pompe Disease in California. *International journal of neonatal screening* **2020**, 6 (1), 9.
2. Burton, B. K.; Charrow, J.; Hoganson, G. E.; Waggoner, D.; Tinkle, B.; Braddock, S. R.; Schneider, M.; Grange, D. K.; Nash, C.; Shryock, H., et al., Newborn Screening for Lysosomal Storage Disorders in Illinois: The Initial 15-Month Experience. *The Journal of pediatrics* **2017**, 190, 130-135.
3. Burton, B.; Charrow, J.; Angle, B.; Widera, S.; Waggoner, D., A Pilot Newborn Screening Program for Lysosomal Storage Disorders (LSD) in Illinois. *Molecular genetics and metabolism* **2012**, 105 (2), S23-S24.
4. Minter Baerg, M. M.; Stoway, S. D.; Hart, J.; Mott, L.; Peck, D. S.; Nett, S. L.; Eckerman, J. S.; Lacey, J. M.; Turgeon, C. T.; Gavrilov, D., et al., Precision newborn screening for lysosomal disorders. *Genetics in Medicine* **2017**, 20 (8), 847-854.
5. Navarrete-Martínez, J. I.; Limón-Rojas, A. E.; Gaytán-García, M. d. J.; Reyna-Figueroa, J.; Wakida-Kusunoki, G.; Delgado-Calvillo, M. d. R.; Cantú-Reyna, C.; Cruz-Camino, H.; Cervantes-Barragán, D. E., Newborn screening for six lysosomal storage disorders in a cohort of Mexican patients: Three-year findings from a screening program in a closed Mexican health system. *Molecular genetics and metabolism* **2017**, 121 (1), 16-21.
6. Hopkins, P. V.; Campbell, C.; Klug, T.; Rogers, S.; Raburn-Miller, J.; Kiesling, J., Lysosomal Storage Disorder Screening Implementation: Findings from the First Six Months of Full Population Pilot Testing in Missouri. *The Journal of pediatrics* **2015**, 166 (1), 172-177.
7. Wasserstein, M. P.; Caggana, M.; Bailey, S. M.; Desnick, R. J.; Edelmann, L.; Estrella, L.; Holzman, I.; Kelly, N. R.; Kornreich, R.; Kupchik, S. G., et al., The New York pilot newborn screening program for lysosomal storage diseases: Report of the First 65,000 Infants. *Genetics in Medicine* **2018**, 21 (3), 631-640.
8. Orsini, J. J.; Kay, D. M.; Saavedra-Matiz, C. A.; Wenger, D. A.; Duffner, P. K.; Erbe, R. W.; Biski, C.; Martin, M.; Krein, L. M.; Nichols, M., et al., Newborn screening for Krabbe disease in New York State: the first eight years' experience. *Genetics in Medicine* **2016**, 18 (3), 239-248.
9. Taylor, J. L.; Clinard, K.; Powell, C. M.; Rehder, C.; Young, S. P.; Bali, D.; Beckloff, S. E.; Gehrtland, L. M.; Kemper, A. R.; Lee, S., et al., The North Carolina Experience with Mucopolysaccharidosis Type I Newborn Screening. *The Journal of pediatrics* **2019**, 211, 193-200.e2.
10. Elliott, S.; Buroker, N.; Cournoyer, J. J.; Potier, A. M.; Trometer, J. D.; Elbin, C.; Schermer, M. J.; Kantola, J.; Boyce, A.; Turecek, F.; Gelb, M. H.; Scott, C. R., Pilot study of newborn screening for six lysosomal storage diseases using Tandem Mass Spectrometry. *Molecular genetics and metabolism* **2016**, 118 (4), 304-309.
11. Scott, C. R.; Elliott, S.; Buroker, N.; Thomas, L. I.; Keutzer, J.; Glass, M.; Gelb, M. H.; Turecek, F., Identification of Infants at Risk for Developing Fabry, Pompe, or Mucopolysaccharidosis-I from Newborn Blood Spots by Tandem Mass Spectrometry. *The Journal of pediatrics* **2013**, 163 (2), 498-503.
12. Scott, C. R.; Elliott, S.; Hong, X.; Huang, J.-Y.; Kumar, A. B.; Yi, F.; Pendem, N.; Chennamaneni, N. K.; Gelb, M. H., Newborn Screening for Mucopolysaccharidoses: Results of a Pilot Study with 100 000 Dried Blood Spots. *The Journal of pediatrics* **2020**, 216, 204-207.
13. Camargo Neto, E.; Schulte, J.; Pereira, J.; Bravo, H.; Sampaio-Filho, C.; Giugliani, R., Neonatal screening for four lysosomal storage diseases with a digital microfluidics platform: Initial results in Brazil. *Genetics and molecular biology* **2018**, 41 (2), 414-416.
14. Giugliani, R., Newborn screening for lysosomal diseases: current status and potential interface with population medical genetics in Latin America. *Journal of inherited metabolic disease* **2012**, 35 (5), 871-877.
15. Mechtler, T. P.; Stary, S.; Metz, T. F.; De Jesús, V. R.; Greber-Platzer, S.; Pollak, A.; Herkner, K. R.; Streubel, B.; Kasper, D. C., Neonatal screening for lysosomal storage disorders: feasibility and incidence from a nationwide study in Austria. *The Lancet* **2012**, 379 (9813), 335-341.

16. Eyskens, F.; Devos, S., Newborn Screening for Lysosomal Storage Disorders in Belgium. *Journal of Inborn Errors of Metabolism and Screening* **2017**, *5*, 232640981774423.
17. Wittmann, J.; Karg, E.; Turi, S.; Legnini, E.; Wittmann, G.; Giese, A.-K.; Lukas, J.; Gölnitz, U.; Klingenhäger, M.; Bodamer, O.; Mühl, A.; Rolfs, A., Newborn Screening for Lysosomal Storage Disorders in Hungary. **2012**, *6*, 117-125.
18. Burlina, A. B.; Polo, G.; Salviati, L.; Duro, G.; Zizzo, C.; Dardis, A.; Bembi, B.; Cazzorla, C.; Rubert, L.; Zordan, R.; Desnick, R. J.; Burlina, A. P., Newborn screening for lysosomal storage disorders by tandem mass spectrometry in North East Italy. *Journal of inherited metabolic disease* **2017**, *41* (2), 209-219.
19. Burlina, A.; Gualdi, D.; Polo, G.; Rubert, L.; Cazzorla, C.; Giuliani, A.; Burlina, A., Newborn screening for MPS I: The clinical benefit. *Molecular genetics and metabolism* **2020**, *129* (2), S35-S36.
20. Spada, M.; Pagliardini, S.; Yasuda, M.; Tükel, T.; Thiagarajan, G.; Sakuraba, H.; Ponzone, A.; Desnick, R. J., High Incidence of Later-Onset Fabry Disease Revealed by Newborn Screening\*. *The American Journal of Human Genetics* **2006**, *79* (1), 31-40.
21. Burlina, A.; Polo, G.; Gualdi, D.; Rubert, L.; Cazzorla, C.; Giuliani, A.; Burlina, A., High incidence of Gaucher disease in northeast Italy: Results from lysosomal newborn screening. *Molecular genetics and metabolism* **2020**, *129* (2), S36.
22. Colon, C.; Ortolano, S.; Melcon-Crespo, C.; Alvarez, J. V.; Lopez-Suarez, O. E.; Couce, M. L.; Fernández-Lorenzo, J. R., Newborn screening for Fabry disease in the north-west of Spain. *European journal of pediatrics* **2017**, *176* (8), 1075-1081.
23. Momosaki, K.; Kido, J.; Yoshida, S.; Sugawara, K.; Miyamoto, T.; Inoue, T.; Okumiya, T.; Matsumoto, S.; Endo, F.; Hirose, S.; Nakamura, K., Newborn screening for Pompe disease in Japan: report and literature review of mutations in the GAA gene in Japanese and Asian patients. *Journal of human genetics* **2019**, *64* (8), 741-755.
24. Han, M.; Jun, S.-H.; Song, S. H.; Park, K. U.; Kim, J. Q.; Song, J., Use of Tandem Mass Spectrometry for Newborn Screening of 6 Lysosomal Storage Disorders in a Korean Population. *The Korean Journal of Laboratory Medicine* **2011**, *31* (4), 250.
25. Cho, S. E.; Kwak, J. R.; Lee, H.; Seo, D. H.; Song, J., Triplex tandem mass spectrometry assays for the screening of 3 lysosomal storage disorders in a Korean population. *Clinica Chimica Acta* **2016**, *454*, 20-27.
26. Kang, L.; Zhan, X.; Gu, X.; Zhang, H., Successful newborn screening for Gaucher disease using fluorometric assay in China. *Journal of human genetics* **2017**, *62* (8), 763-768.
27. Chien, Y. H.; Chiang, S. C.; Zhang, X. K.; Keutzer, J.; Lee, N. C.; Huang, A. C.; Chen, C. A.; Wu, M. H.; Huang, P. H.; Tsai, F. J.; Chen, Y. T.; Hwu, W. L., Early Detection of Pompe Disease by Newborn Screening Is Feasible: Results From the Taiwan Screening Program. *Pediatrics* **2008**, *122* (1), e39-e45.
28. Liao, H.-C.; Chiang, C.-C.; Niu, D.-M.; Wang, C.-H.; Kao, S.-M.; Tsai, F.-J.; Huang, Y.-H.; Liu, H.-C.; Huang, C.-K.; Gao, H.-J., et al., Detecting multiple lysosomal storage diseases by tandem mass spectrometry — A national newborn screening program in Taiwan. *Clinica Chimica Acta* **2014**, *431*, 80-86.
29. Yang, C.-F.; Liu, H.-C.; Hsu, T.-R.; Tsai, F.-C.; Chiang, S.-F.; Chiang, C.-C.; Ho, H.-C.; Lai, C.-J.; Yang, T.-F.; Chuang, S.-Y.; Lin, C.-Y.; Niu, D.-M., A large-scale nationwide newborn screening program for pompe disease in Taiwan: Towards effective diagnosis and treatment. *American Journal of Medical Genetics Part A* **2014**, *164* (1), 54-61.
30. Chien, Y.-H.; Lee, N.-C.; Chen, P.-W.; Yeh, H.-Y.; Gelb, M. H.; Chiu, P.-C.; Chu, S.-Y.; Lee, C.-H.; Lee, A.-R.; Hwu, W.-L., Newborn screening for Morquio disease and other lysosomal storage diseases: results from the 8-plex assay for 70,000 newborns. *Orphanet journal of rare diseases* **2020**, *15* (1),
31. Meikle, P. J.; Grasby, D. J.; Dean, C. J.; Lang, D. L.; Bockmann, M.; Whittle, A. M.; Fietz, M. J.; Simonsen, H.; Fuller, M.; Brooks, D. A.; Hopwood, J. J., Newborn screening for lysosomal storage disorders. *Molecular genetics and metabolism* **2006**, *88* (4), 307-314.
