# Supplementary material for: Highlights on Genomics Applications for Lysosomal Storage Diseases
Source: MDPI journal article supplement (doi:10.3390/cells9081902), 2020-08-14
Supplement: s1 [file s1]

### NGS panels for LSDs diagnosis

| PROVIDER                                       | PANEL NAME                                                       | TIME                | N. of genes | LINK                                                                                                                                                                                                                                         | COUNTRY                                               |
|------------------------------------------------|------------------------------------------------------------------|---------------------|-------------|----------------------------------------------------------------------------------------------------------------------------------------------------------------------------------------------------------------------------------------------|-------------------------------------------------------|
| <i>Greenwood Genetic center</i>                | Lysosomal Storage Disease Sequencing Panel                       | 8-10 weeks          | 75          | <a href="http://www.ggc.org/test-finder-item/lysosomal-storage-disease-74-gene-sequencing-panel">www.ggc.org/test-finder-item/lysosomal-storage-disease-74-gene-sequencing-panel</a>                                                         | South Carolina, USA                                   |
| <i>CENTOPEDIA - CENTOGENE</i>                  | Lysosomal storage disease NGS Panel + CNV                        | 25 business days    | 50          | <a href="http://www.centogene.com/science/centopedia/lysosomal-storage-diseases-lsd-panel.html">www.centogene.com/science/centopedia/lysosomal-storage-diseases-lsd-panel.html</a>                                                           | Rostock, Germany and Cambridge, Massachusetts, USA    |
| <i>BiooScientific (a Perkin Elmer company)</i> | NEXTFLEX® Lysosomal Storage Disorders Amplicon Panel             | N/A                 | 11          | <a href="http://www.rafer.es/sites/default/files/enfermedades_deposito_lisomal.pdf">www.rafer.es/sites/default/files/enfermedades_deposito_lisomal.pdf</a>                                                                                   | Burleson Rd, Austin, TX, USA                          |
| <i>PALM</i>                                    | London Health Sciences Centre Lysosomal Storage Panel (LHSC LSD) | 4 – 6 weeks         | 50          | <a href="http://www.lhsc.on.ca/palm/molecular/panels.html#storage">www.lhsc.on.ca/palm/molecular/panels.html#storage</a>                                                                                                                     | London, UK                                            |
| <i>Eurofins Clinical Diagnostics</i>           | Lysosomal Storage Disorders Panel: Sequencing and CNV Analysis   | 6 weeks             | 60          | <a href="http://www.egl-eurofins.com/tests/MM120">www.egl-eurofins.com/tests/MM120</a>                                                                                                                                                       | Tucker, Georgia, USA                                  |
| <i>GeneDx</i>                                  | Combined Lysosomal and Peroxisomal Disorders Panel               | 4 weeks             | 82          | <a href="http://www.genedx.com/test-catalog/disorders/lysosomal-storage-disorders/">www.genedx.com/test-catalog/disorders/lysosomal-storage-disorders/</a>                                                                                   | Gaithersburg, Maryland, USA                           |
|                                                | Lysosomal Disorder Panel                                         |                     | 57          |                                                                                                                                                                                                                                              |                                                       |
| <i>Asper biogene</i>                           | Lysosomal Storage Disease NGS panel                              | 6-9 weeks           | 50          | <a href="http://www.asperbio.com/asper-metabolic-disorders/lysosomal-storage-disease-ngs-panel/">www.asperbio.com/asper-metabolic-disorders/lysosomal-storage-disease-ngs-panel/</a>                                                         | Tartu, ESTONIA                                        |
| <i>Invitae Corporation</i>                     | Invitae Comprehensive Lysosomal Storage Disorders Panel          | 10–21 calendar days | 48          | <a href="http://www.invitae.com/en/physician/tests/06170/#info-panel-resources">www.invitae.com/en/physician/tests/06170/#info-panel-resources</a>                                                                                           | San Francisco, CA, USA                                |
| <i>Blue Print Genetics</i>                     | Lysosomal Disorders and Mucopolysaccharidosis Panel              | 4 weeks             | 102         | <a href="http://blueprintgenetics.com/tests/panels/metabolic-disorders/lysosomal-disorders-and-mucopolysaccharidosis-panel/">blueprintgenetics.com/tests/panels/metabolic-disorders/lysosomal-disorders-and-mucopolysaccharidosis-panel/</a> | Keilaranta Espoo Finland                              |
| <i>Mayo Clinic Laboratories</i>                | Lysosomal Next-Generation Sequencing                             | 4-5 weeks           | 58          | <a href="http://www.mayocliniclabs.com/test-catalog/Clinical+and+Interpretive/605162">www.mayocliniclabs.com/test-catalog/Clinical+and+Interpretive/605162</a>                                                                               | Rochester (MN), Phoenix (AZ), Jacksonville (FL) - USA |
| <i>Fulgent genetics</i>                        | Lysosomal Disorders NGS Panel                                    | 3 - 5 weeks         | 106         | <a href="http://www.fulgentgenetics.com/Lysosomal-Disorders">www.fulgentgenetics.com/Lysosomal-Disorders</a>                                                                                                                                 | Pavia, Italy                                          |
